# Supplementary material
Source: PubMed Central journal article supplement (PMC5777137)
Supplement: NIHMS933068-supplement-supplement_1.pdf [file NIHMS933068-supplement-supplement_1.pdf]

## Supplemental Figure 1

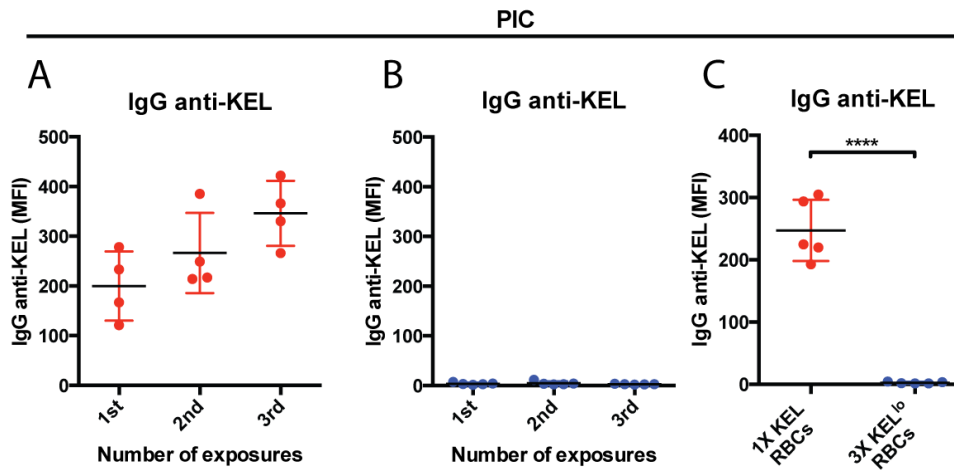

**Supplemental Figure 1: KEL<sup>lo</sup> RBCs fail to induce detectable anti-KEL antibodies in the presence of PIC.** (A,B) C57BL/6 KEL negative recipients were exposed to one, two or three doses of KEL (A) or KEL<sup>lo</sup> (B) RBCs in the presence of PIC, followed by examination of IgG anti-KEL antibody formation. (C) C57BL/6 KEL negative recipients were exposed to a normal dose of KEL RBCs or 3 times the normal dose of KEL<sup>lo</sup> RBCs in the presence of PIC, followed by evaluation of IgG anti-KEL antibodies. Data were analyzed using student t-test. Error bars indicate SEM. \*\*\*\*P < 0.0001.

## Supplemental Figure 2

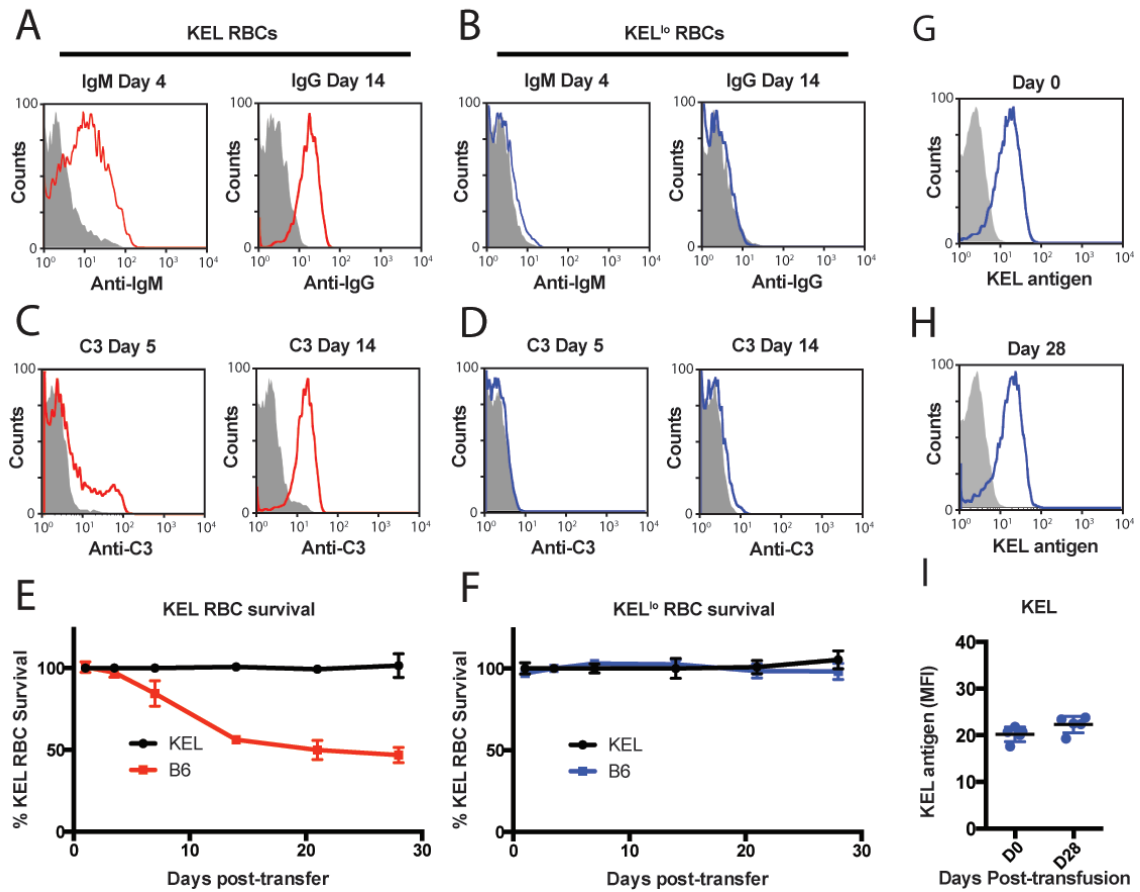

**Supplemental Figure 2: KEL<sup>lo</sup> RBCs fail to induce antibody engagement, complement fixation, experience accelerated clearance or alteration to antigen levels following transfer.** (A) Detection of IgM or IgG on the surface of KEL RBCs 4 days (IgM) or 14 days (IgG) following transfer into C57BL/6 KEL negative recipients. (B) Detection of IgM or IgG on the surface of KEL<sup>lo</sup> RBCs 4 days (IgM) or 14 days (IgG) following transfer into C57BL/6 KEL negative recipients. (C) Detection of complement component 3 (C3) on the surface of KEL RBCs 4 days or 14 days following transfer into C57BL/6 KEL negative recipients. (D) Detection of C3

on the surface of KEL<sup>lo</sup> RBCs 4 days or 14 days following transfer into C57BL/6 KEL negative recipients. (E) Examination of KEL RBC clearance following transfer into C57BL/6 KEL positive (black) or KEL negative (red) recipients. (F) Examination of KEL<sup>lo</sup> RBC clearance following transfer into C57BL/6 KEL positive (black) or KEL negative (blue) recipients. (G-H) Detection of KEL antigen on the surface of KEL<sup>lo</sup> RBCs 0 days (G) or 28 days (H) following transfer into C57BL/6 KEL negative recipients. (I) Quantitation of KEL antigen level on KEL<sup>lo</sup> RBCs 0 days or 28 days following transfer into C57BL/6 KEL negative recipients.

### Supplemental Figure 3

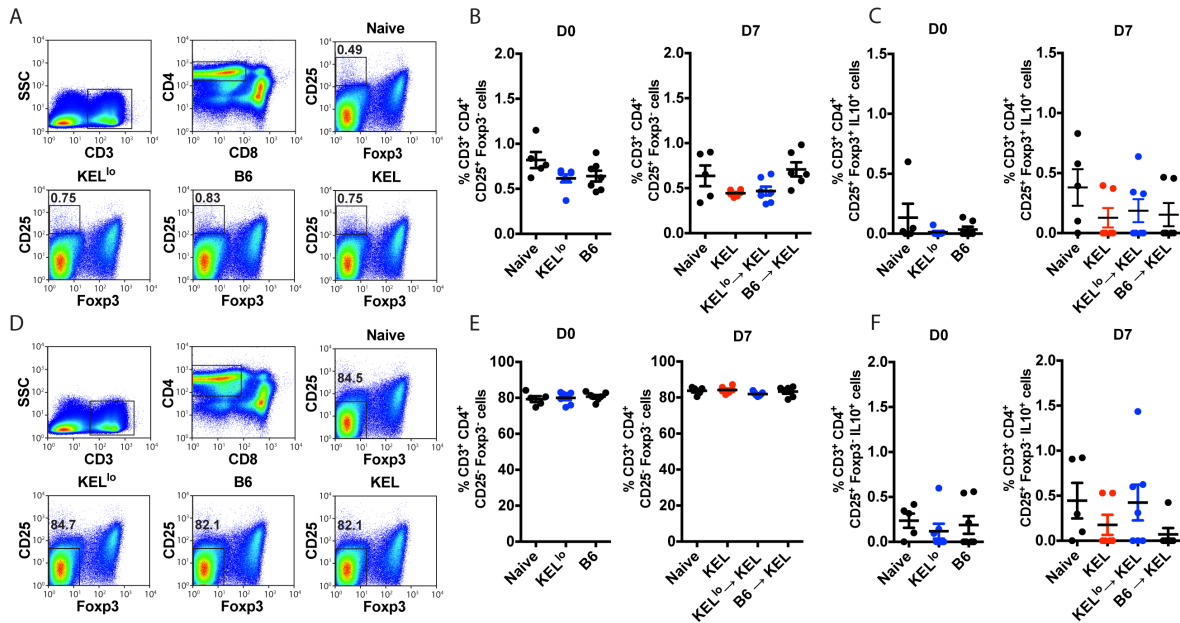

### Supplemental Figure 3: $KEL^{lo}$ RBC exposure fails to induce detectable change

### in cytokine secretion of regulatory T cells (Tregs). (A) Representative flow

cytometric examination of  $CD25^+ F_{oxp3}^-$  T regulatory 1 (Tr1) cells following

exposure to PBS, C57BL/6 (B6), KEL or  $KEL^{lo}$  RBCs. (B) Quantitation of  $CD25^+ F_{oxp3}^-$  Tr1 cells in PBS, C57BL/6 (B6) or  $KEL^{lo}$  RBC treated recipients in the absence

(D0 = Day 0) or presence (D7 = Day 7) of a subsequent KEL RBC transfusion. (C)

Quantitation of IL10 production by  $CD25^+ F_{oxp3}^+$  T cells following exposure to PBS,

C57BL/6 (B6) or  $KEL^{lo}$  RBC (D0 = Day 0), or following KEL RBC challenge of each

recipient group (D7 = Day 7). (D) Representative flow cytometric plots of  $CD25^+ F_{oxp3}^-$  T cells post PBS, C57BL/6 (B6),  $KEL^{lo}$ , or KEL RBC transfusion. (E)

Quantitative analysis of  $CD25^+ F_{oxp3}^-$  T cells in PBS, C57BL/6 (B6) or  $KEL^{lo}$  RBC

treated recipients prior to (D0 = Day 0) and following (D7 = Day 7) exposure of a subsequent KEL RBC transfusion. (F) Quantitation of IL10 production of CD25<sup>+</sup> Foxp3<sup>-</sup> T cells following exposure to PBS, C57BL/6 (B6) or KEL<sup>l<sup>o</sup></sup> RBC (D0 = Day 0), or following KEL RBC challenge of each recipient group (D7 = Day 7).

## Supplemental Figure 4

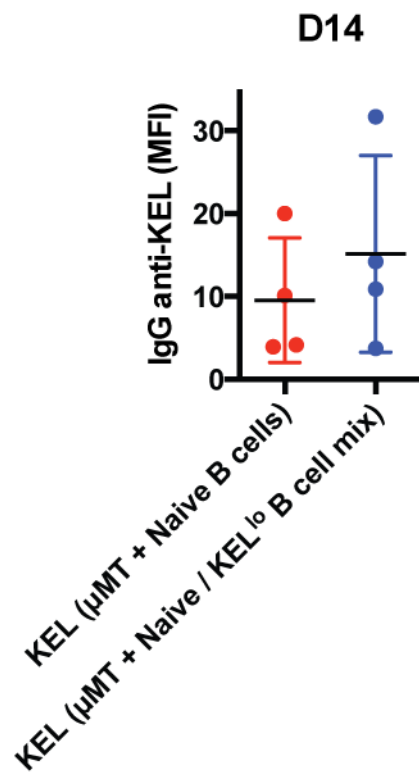

**Supplemental Figure 4: Co-transfer of B cells from  $KEL^{lo}$  recipients along with naïve B cells fails to inhibit anti-KEL antibody production following KEL RBC transfer.** Examination of anti-KEL antibody production following KEL RBC transfusion into  $\mu$ MT recipients adoptively transferred with B cells from C57BL/6 naïve ( $\mu$ MT + Naïve B cells) or a 1:1 ratio ( $5 \times 10^7$  each) B cells from C57BL/6 naïve or  $KEL^{lo}$  treated recipients ( $\mu$ MT + Naïve/ $KEL^{lo}$  recip. B cell mix).
